# Supplementary material for: MicroRNA-338-5p modulates pulmonary hypertension-like injuries caused by SO2, NO2and PM2.5co-exposure through targeting the HIF-1α/Fhl-1 pathway
Source: Royal Society of Chemistry journal article supplement (doi:10.1039/c6tx00257a), 2016-01-01
Supplement: c6tx00257a1.pdf [file c6tx00257a1.pdf]

SUPPLEMENTAL MATERIAL

**MicroRNA-338-5p modulates pulmonary hypertension-like injuries caused by SO<sub>2</sub>, NO<sub>2</sub> and PM<sub>2.5</sub> co-exposure through targeting the HIF-1 $\alpha$ /Fhl-1 pathway**

Xiaotong Ji, Yingying Zhang, Tingting Ku, Yang Yun, Guangke Li, Nan Sang\*

*College of Environment and Resource, Research Center of Environment and Health, Shanxi University, Taiyuan, Shanxi 030006, PR China*

\* Corresponding author: Nan Sang, College of Environment and Resource, Research Center of Environment and Health, Shanxi University, Taiyuan, Shanxi Province, China. Tel.: 86-351-7011932; Fax: 86-351-7011932; E-mail: [sangnan@sxu.edu.cn](mailto:sangnan@sxu.edu.cn).

**Table S1 Primers sequences used for real-time RT-PCR**

| <b>miRNA</b>           | <b>Sequences (5'-3')</b> |
|------------------------|--------------------------|
| <b>mmu-miR-142-5p</b>  | CGCATAAAGTAGAAAGCACT     |
| <b>mmu-miR-338-5p</b>  | CAATATCCTGGTGCTGAGTG     |
| <b>mmu-miR-450b-3p</b> | ATTGGGAACATTTTGCAT       |
| <b>U6</b>              | TCGCTTCGGCAGCACATA       |

**Table S2 Pearson correlation coefficient (R) of signal densities between two replicates for each treat group**

|           | <b>C1</b> | <b>C2</b> | <b>C3</b> | <b>L1</b> | <b>L2</b> | <b>L3</b> | <b>H1</b> | <b>H2</b> | <b>H3</b> |
|-----------|-----------|-----------|-----------|-----------|-----------|-----------|-----------|-----------|-----------|
| <b>C1</b> | 1         | 0.9892    | 0.9777    | 0.9769    | 0.9773    | 0.9650    | 0.9751    | 0.9743    | 0.9723    |
| <b>C2</b> | 0.9892    | 1         | 0.9768    | 0.9765    | 0.9803    | 0.9708    | 0.9768    | 0.9703    | 0.9713    |
| <b>C3</b> | 0.9777    | 0.9768    | 1         | 0.9673    | 0.9670    | 0.9755    | 0.9634    | 0.9670    | 0.9722    |
| <b>L1</b> | 0.9769    | 0.9765    | 0.9673    | 1         | 0.9747    | 0.9447    | 0.9598    | 0.9747    | 0.9608    |
| <b>L2</b> | 0.9773    | 0.9803    | 0.9670    | 0.9747    | 1         | 0.9583    | 0.9715    | 0.9781    | 0.9687    |
| <b>L3</b> | 0.9650    | 0.9708    | 0.9755    | 0.9447    | 0.9583    | 1         | 0.9714    | 0.9529    | 0.9718    |
| <b>H1</b> | 0.9751    | 0.9768    | 0.9634    | 0.9598    | 0.9715    | 0.9714    | 1         | 0.9810    | 0.9760    |
| <b>H2</b> | 0.9743    | 0.9703    | 0.9670    | 0.9747    | 0.9781    | 0.9529    | 0.9810    | 1         | 0.9758    |
| <b>H3</b> | 0.9723    | 0.9713    | 0.9722    | 0.9608    | 0.9687    | 0.9718    | 0.9760    | 0.9758    | 1         |

<sup>a</sup>Note. "C1", "C2" and "C3"represents replicate 1, 2 and 3 of control group, respectively. "H1", "H2" and "H3"represents replicate 1, 2 and 3 of high concentration group, respectively.

**Table S3 miRNAs with significant expression levels in the lungs after co-exposure to air pollutants**

| miRNAs                          | SO <sub>2</sub> +NO <sub>2</sub> +PM <sub>2.5</sub> (low) | miRNAs                           | SO <sub>2</sub> +NO <sub>2</sub> +PM <sub>2.5</sub> (high) |
|---------------------------------|-----------------------------------------------------------|----------------------------------|------------------------------------------------------------|
|                                 | Fold Change(p-value)                                      |                                  | Fold Change(p-value)                                       |
| <b>Down-regulated<br/>(n=3)</b> |                                                           | <b>Down-regulated<br/>(n=12)</b> |                                                            |
| <b>mmu-miR-3095-3p</b>          | 0.72(0.0023)                                              | <b>mmu-miR-1196-3p</b>           | 0.41(0.0437)                                               |
| <b>mmu-miR-375-3p</b>           | 0.86(0.0238)                                              | <b>mmu-miR-1894-3p</b>           | 0.51(0.0369)                                               |
| <b>mmu-let-7e-5p</b>            | 0.90(0.0234)                                              | <b>mmu-miR-3070b-3p</b>          | 0.56(0.0458)                                               |
|                                 |                                                           | <b>mmu-miR-1927</b>              | 0.64(0.0133)                                               |
|                                 |                                                           | <b>mmu-miR-504-3p</b>            | 0.68(0.0078)                                               |
|                                 |                                                           | <b>mmu-miR-674-5p</b>            | 0.72(0.0057)                                               |
|                                 |                                                           | <b>mmu-miR-500-3p</b>            | 0.74(0.0279)                                               |
|                                 |                                                           | <b>mmu-miR-338-5p</b>            | 0.84(0.0108)                                               |
|                                 |                                                           | <b>mmu-miR-450b-3p</b>           | 0.84(0.0182)                                               |
|                                 |                                                           | <b>mmu-miR-185-5p</b>            | 0.86(0.0175)                                               |
|                                 |                                                           | <b>mmu-miR-374c-5p</b>           | 0.87(0.0039)                                               |
|                                 |                                                           | <b>mmu-miR-425-5p</b>            | 0.90(0.0063)                                               |
| <b>up-regulated<br/>(n=3)</b>   |                                                           | <b>up-regulated<br/>(n=6)</b>    |                                                            |
| <b>mmu-miR-34b-5p</b>           | 1.13(0.0055)                                              | <b>mmu-miR-3096b-3p</b>          | 1.16(0.0291)                                               |
| <b>mmu-miR-30e-5p</b>           | 1.13(0.0173)                                              | <b>mmu-miR-34b-5p</b>            | 1.19(0.0296)                                               |
| <b>mmu-miR-3096b-3p</b>         | 1.19(0.0069)                                              | <b>mmu-miR-142-5p</b>            | 1.20(0.0239)                                               |
|                                 |                                                           | <b>mmu-miR-1249-3p</b>           | 1.21(0.0129)                                               |
|                                 |                                                           | <b>mmu-miR-434-3p</b>            | 1.45(0.0482)                                               |
|                                 |                                                           | <b>mmu-miR-205-5p</b>            | 5.95(0.0395)                                               |

**Table S4 Predicted potential targets for miR-338-5p using five bioinformatics software namely TargetScan, miRanda, PicTar, MirTarget2 and PITA**

| Accession No. | Gene ID | description                                                                                      |
|---------------|---------|--------------------------------------------------------------------------------------------------|
| NM_031166     | 15904   | Mus musculus inhibitor of DNA binding 4 (Id4), mRNA                                              |
| NM_001083806  | 14800   | Mus musculus glutamate receptor, ionotropic, AMPA2 (alpha 2) (Gria2), transcript variant 1, mRNA |
| NM_027900     | 71750   | Mus musculus R3H domain containing 2 (R3hdm2), transcript variant 2, mRNA                        |
| NM_001098171  | 18526   | Mus musculus protocadherin 10 (Pcdh10), transcript variant 3, mRNA                               |
| NM_001079883  | 58208   | Mus musculus B cell leukemia/lymphoma 11B (Bcl11b), transcript variant 1, mRNA                   |
| NM_001037863  | 320940  | Mus musculus ATPase, class VI, type 11C (Atp11c), transcript variant 1, mRNA                     |
| NM_008512     | 16971   | Mus musculus low density lipoprotein receptor-related protein 1 (Lrp1), mRNA                     |
| NM_026420     | 67869   | Mus musculus polyadenylate-binding protein-interacting protein 2 (Paip2), mRNA                   |
| NM_001081300  | 110796  | Mus musculus teashirt zinc finger family member 1 (Tshz1), mRNA                                  |
| NM_177747     | 245595  | Mus musculus zinc finger protein 711 (Zfp711), mRNA                                              |
| NM_010879     | 17974   | Mus musculus non-catalytic region of tyrosine kinase adaptor protein 2 (Nck2), mRNA              |
| NM_010698     | 16826   | Mus musculus LIM domain binding 2 (Ldb2), transcript variant 1, mRNA                             |
| NM_198862     | 216856  | Mus musculus neuroligin 2 (Nlgn2), mRNA                                                          |
| NM_001081196  | 68693   | Mus musculus heterogeneous nuclear ribonucleoprotein U-like 2 (Hnrnpul2), mRNA                   |
| NM_018745     | 54375   | Mus musculus antizyme inhibitor 1 (Azin1), transcript variant 2, mRNA                            |
| NM_145575     | 109624  | Mus musculus caldesmon 1 (Cald1), mRNA                                                           |
| NM_021605     | 59125   | Mus musculus NIMA (never in mitosis gene a)-related expressed kinase 7 (Nek7), mRNA              |
| NM_009427     | 22057   | Mus musculus transducer of ErbB-2.1 (Tob1), mRNA                                                 |
| NM_019634     | 21912   | Mus musculus tetraspanin 7 (Tspan7), mRNA                                                        |
| NM_011364     | 20400   | Mus musculus SH2 domain protein 1A (Sh2d1a), mRNA                                                |
| NM_008891     | 18949   | Mus musculus pinin (Pnn), mRNA                                                                   |
| NM_011898     | 24066   | Mus musculus sprouty homolog 4 (Drosophila) (Spry4), mRNA                                        |
| NM_178357     | 194655  | Mus musculus Kruppel-like factor 11 (Klf11), mRNA                                                |
| NM_172684     | 229675  | Mus musculus rosbins, round spermatid basic protein 1 (Rsb1), mRNA                               |
| NM_010825     | 17536   | Mus musculus Meis homeobox 2 (Meis2), transcript variant 2,                                      |

---

|              |        |                                                                                                                                                |
|--------------|--------|------------------------------------------------------------------------------------------------------------------------------------------------|
|              |        | mRNA                                                                                                                                           |
| NM_018824    | 54338  | Mus musculus solute carrier family 23 (nucleobase transporters), member 2 (Slc23a2), mRNA                                                      |
| NM_198300    | 208922 | Mus musculus cytoplasmic polyadenylation element binding protein 3 (Cpeb3), mRNA                                                               |
| NM_028810    | 74194  | Mus musculus Rho family GTPase 3 (Rnd3), mRNA                                                                                                  |
| NM_020007    | 56758  | Mus musculus muscleblind-like 1 (Drosophila) (Mbnl1), transcript variant 1, mRNA                                                               |
| NM_172436    | 78830  | Mus musculus solute carrier family 25 (mitochondrial carrier, Aralar), member 12 (Slc25a12), nuclear gene encoding mitochondrial protein, mRNA |
| NM_008679    | 17979  | Mus musculus nuclear receptor coactivator 3 (Ncoa3), mRNA                                                                                      |
| NM_025951    | 67073  | Mus musculus phosphatidylinositol 4-kinase type 2 beta (Pi4k2b), transcript variant 1, mRNA                                                    |
| NM_010431    | 15251  | Mus musculus hypoxia inducible factor 1, alpha subunit (Hif1a), mRNA                                                                           |
| NM_177387    | 338362 | Mus musculus uronyl-2-sulfotransferase (Ust), mRNA                                                                                             |
| NM_212450    | 329506 | Mus musculus CTD (carboxy-terminal domain, RNA polymerase II, polypeptide A) small phosphatase like 2 (Ctdspl2), mRNA                          |
| NM_019796    | 56403  | Mus musculus synaptotagmin binding, cytoplasmic RNA interacting protein (Syncrip), transcript variant 2, mRNA                                  |
| NM_009289    | 20874  | Mus musculus STE20-like kinase (Slk), transcript variant 1, mRNA                                                                               |
| NM_010914    | 18045  | Mus musculus nuclear transcription factor-Y beta (Nfyb), mRNA                                                                                  |
| NM_016851    | 54139  | Mus musculus interferon regulatory factor 6 (Irf6), mRNA                                                                                       |
| NM_027295    | 100972 | Mus musculus RAB28, member RAS oncogene family (Rab28), mRNA                                                                                   |
| NM_011376    | 20464  | Mus musculus single-minded homolog 1 (Drosophila) (Sim1), mRNA                                                                                 |
| NM_013556    | 15452  | Mus musculus hypoxanthine guanine phosphoribosyl transferase (Hprt), mRNA                                                                      |
| NM_001081034 | 225055 | Mus musculus F-box protein 11 (Fbxo11), mRNA                                                                                                   |
| NM_001081477 | 382236 | Mus musculus bromodomain and WD repeat domain containing 3 (Brwd3), mRNA                                                                       |
| NM_008090    | 14461  | Mus musculus GATA binding protein 2 (Gata2), mRNA                                                                                              |
| NM_008057    | 14369  | Mus musculus frizzled homolog 7 (Drosophila) (Fzd7), mRNA                                                                                      |
| NM_178890    | 99382  | Mus musculus ankyrin repeat and BTB (POZ) domain containing 2 (Abtb2), mRNA                                                                    |
| NM_007705    | 12696  | Mus musculus cold inducible RNA binding protein (Cirbp), mRNA                                                                                  |
| NM_194055    | 207920 | Mus musculus epithelial splicing regulatory protein 1 (Esrp1), mRNA                                                                            |
| NM_009817    | 12380  | Mus musculus calpastatin (Cast), mRNA                                                                                                          |

---

---

|              |        |                                                                                                                                     |
|--------------|--------|-------------------------------------------------------------------------------------------------------------------------------------|
| NM_010897    | 18015  | Mus musculus neurofibromatosis 1 (Nf1), mRNA                                                                                        |
| NM_053075    | 19744  | Mus musculus Ras homolog enriched in brain (Rheb), mRNA                                                                             |
| NM_009627    | 11535  | Mus musculus adrenomedullin (Adm), mRNA                                                                                             |
| NM_010217    | 14219  | Mus musculus connective tissue growth factor (Ctgf), mRNA                                                                           |
| NM_177821    | 328572 | Mus musculus E1A binding protein p300 (Ep300), mRNA                                                                                 |
| NM_144802    | 72692  | Mus musculus heterogeneous nuclear ribonucleoprotein L-like (Hnrpll), mRNA                                                          |
| NM_031179    | 81898  | Mus musculus splicing factor 3b, subunit 1 (Sf3b1), mRNA                                                                            |
| NM_001037099 | 12298  | Mus musculus calcium channel, voltage-dependent, beta 4 subunit (Cacnb4), transcript variant 1, mRNA                                |
| NM_001081395 | 75723  | Mus musculus angiomin-like 1 (Amotl1), mRNA                                                                                         |
| NM_011809    | 23872  | Mus musculus E26 avian leukemia oncogene 2, 3' domain (Ets2), mRNA                                                                  |
| NM_013635    | 19027  | Mus musculus synaptophysin-like protein (Sypl), transcript variant 1, mRNA                                                          |
| NM_010933    | 18159  | Mus musculus natriuretic peptide type C (Nppc), mRNA                                                                                |
| NM_145515    | 226778 | Mus musculus MAP/microtubule affinity-regulating kinase 1 (Mark1), mRNA                                                             |
| NM_009859    | 235072 | Mus musculus septin 7 (Sept7), transcript variant 1, mRNA                                                                           |
| NM_011957    | 26427  | Mus musculus cAMP responsive element binding protein 3-like 1 (Creb3l1), mRNA                                                       |
| NM_019840    | 18578  | Mus musculus phosphodiesterase 4B, cAMP specific (Pde4b), transcript variant 1, mRNA                                                |
| NM_145148    | 232288 | Mus musculus FERM domain containing 4B (Frmd4b), mRNA                                                                               |
| NM_019812    | 93759  | Mus musculus sirtuin 1 (silent mating type information regulation 2, homolog) 1 (S. cerevisiae) (Sirt1), transcript variant 1, mRNA |
| NM_011445    | 20679  | Mus musculus SRY-box containing gene 6 (Sox6), transcript variant 1, mRNA                                                           |
| NM_009843    | 12477  | Mus musculus cytotoxic T-lymphocyte-associated protein 4 (Ctla4), mRNA                                                              |
| NM_029924    | 109241 | Mus musculus methyl-CpG binding domain protein 5 (Mbd5), mRNA                                                                       |
| NM_001080931 | 327987 | Mus musculus mediator complex subunit 13 (Med13), mRNA                                                                              |
| NM_029456    | 52036  | Mus musculus protein phosphatase 6, regulatory subunit 3 (Ppp6r3), transcript variant 2, mRNA                                       |
| NM_013885    | 29876  | Mus musculus chloride intracellular channel 4 (mitochondrial) (Clic4), nuclear gene encoding mitochondrial protein, mRNA            |
| NM_011768    | 22764  | Mus musculus zinc finger protein X-linked (Zfx), transcript variant 2, mRNA                                                         |
| NM_010834    | 17700  | Mus musculus myostatin (Mstn), mRNA                                                                                                 |
| NM_001025572 | 106585 | Mus musculus ankyrin repeat domain 12 (Ankrd12), mRNA                                                                               |
| NM_144825    | 216965 | Mus musculus TAO kinase 1 (Taok1), mRNA                                                                                             |
| NM_007604    | 12343  | Mus musculus capping protein (actin filament) muscle Z-line,                                                                        |

---

---

|              |        |                                                                                                            |
|--------------|--------|------------------------------------------------------------------------------------------------------------|
|              |        | alpha 2 (Capza2), mRNA                                                                                     |
| NM_175836    | 20742  | Mus musculus spectrin beta, non-erythrocytic 1 (Sptbn1), transcript variant 1, mRNA                        |
| NM_001045536 | 195018 | Mus musculus zinc finger, ZZ-type with EF hand domain 1 (Zzef1), mRNA                                      |
| NM_177371    | 326623 | Mus musculus tumor necrosis factor (ligand) superfamily, member 15 (Tnfsf15), mRNA                         |
| NM_029441    | 75796  | Mus musculus chromodomain protein, Y chromosome-like 2 (Cdy12), mRNA                                       |
| NM_133188    | 70248  | Mus musculus DAZ associated protein 1 (Dazap1), transcript variant 1, mRNA                                 |
| NM_029791    | 76895  | Mus musculus bicaudal D homolog 2 (Drosophila) (Bicd2), transcript variant 2, mRNA                         |
| NM_001081348 | 94253  | Mus musculus HECT, C2 and WW domain containing E3 ubiquitin protein ligase 1 (Hecw1), mRNA                 |
| NM_008740    | 18195  | Mus musculus N-ethylmaleimide sensitive fusion protein (Nsf), mRNA                                         |
| NM_007865    | 13388  | Mus musculus delta-like 1 (Drosophila) (Dl1), mRNA                                                         |
| NM_027470    | 70584  | Mus musculus p21 protein (Cdc42/Rac)-activated kinase 4 (Pak4), mRNA                                       |
| NM_001001798 | 320940 | Mus musculus ATPase, class VI, type 11C (Atp11c), transcript variant 2, mRNA                               |
| NM_172664    | 228012 | Mus musculus tousled-like kinase 1 (Tlk1), mRNA                                                            |
| NM_020005    | 18519  | Mus musculus K(lysine) acetyltransferase 2B (Kat2b), transcript variant 1, mRNA                            |
| NM_009640    | 11600  | Mus musculus angiopoietin 1 (Angpt1), mRNA                                                                 |
| NM_019737    | 56386  | Mus musculus UDP-Gal:betaGlcNAc beta 1,4-galactosyltransferase, polypeptide 6 (B4galt6), mRNA              |
| NM_015791    | 50753  | Mus musculus F-box protein 8 (Fbxo8), mRNA                                                                 |
| NM_008541    | 17129  | Mus musculus SMAD family member 5 (Smad5), transcript variant 1, mRNA                                      |
| NM_133219    | 14538  | Mus musculus glucosaminyl (N-acetyl) transferase 2, I-branching enzyme (Gcnt2), transcript variant 3, mRNA |
| NM_026476    | 67958  | Mus musculus U2 snRNP-associated SURP domain containing (U2surp), transcript variant 2, mRNA               |
| NM_001040106 | 269774 | Mus musculus AP2 associated kinase 1 (Aak1), transcript variant 1, mRNA                                    |
| NM_025483    | 66315  | Mus musculus SUMO1/sentrin specific peptidase 7 (Senp7), transcript variant 1, mRNA                        |
| NM_007726    | 12801  | Mus musculus cannabinoid receptor 1 (brain) (Cnr1), mRNA                                                   |
| NM_028459    | 73178  | Mus musculus Wiskott-Aldrich syndrome-like (human) (Wasl), transcript variant 1, mRNA                      |
| NM_001081356 | 67048  | Mus musculus VMA21 vacuolar H <sup>+</sup> -ATPase homolog (S. cerevisiae) (Vma21), mRNA                   |

---



---

|              |        |                                                                                          |
|--------------|--------|------------------------------------------------------------------------------------------|
| NM_013464    | 11622  | Mus musculus aryl-hydrocarbon receptor (Ahr), mRNA                                       |
| NM_172882    | 72145  | Mus musculus WD repeat and FYVE domain containing 3 (Wdfy3), mRNA                        |
| NM_139146    | 212712 | Mus musculus special AT-rich sequence binding protein 2 (Satb2), mRNA                    |
| NM_011866    | 23984  | Mus musculus phosphodiesterase 10A (Pde10a), mRNA                                        |
| NM_019831    | 56364  | Mus musculus zinc finger, MYM-type 3 (Zmym3), transcript variant 1, mRNA                 |
| NM_011808    | 23871  | Mus musculus E26 avian leukemia oncogene 1, 5' domain (Ets1), transcript variant 1, mRNA |
| NM_145556    | 230908 | Mus musculus TAR DNA binding protein (Tardbp), transcript variant 1, mRNA                |
| NM_011935    | 26381  | Mus musculus estrogen-related receptor gamma (Esrrg), transcript variant 1, mRNA         |
| NM_008253    | 15354  | Mus musculus high mobility group box 3 (Hmgb3), mRNA                                     |
| NM_001001182 | 407823 | Mus musculus bromodomain adjacent to zinc finger domain, 2B (Baz2b), mRNA                |
| NM_172958    | 268783 | Mus musculus myotubularin related protein 12 (Mtmr12), mRNA                              |

---

**Table S5 Predicted potential targets for miR-450b-3p using five bioinformatics software namely TargetScan, miRanda, PicTar, MirTarget2 and PITA**

| <b>Accession No.</b> | <b>Gene ID</b> | <b>description</b>                                                                                                                                                         |
|----------------------|----------------|----------------------------------------------------------------------------------------------------------------------------------------------------------------------------|
| NM_007664            | 12558          | Mus musculus cadherin 2 (Cdh2), mRNA                                                                                                                                       |
| NM_015753            | 24136          | Mus musculus zinc finger E-box binding homeobox 2 (Zeb2), transcript variant 2, mRNA                                                                                       |
| NM_013927            | 30952          | Mus musculus cyclic nucleotide gated channel beta 3 (Cngb3), mRNA                                                                                                          |
| NM_009223            | 20621          | Mus musculus stannin (Snn), mRNA                                                                                                                                           |
| NM_177224            | 109151         | Mus musculus chromodomain helicase DNA binding protein 9 (Chd9), mRNA                                                                                                      |
| NM_008166            | 14803          | Mus musculus glutamate receptor, ionotropic, delta 1 (Grid1), mRNA                                                                                                         |
| NM_001077265         | 11991          | Mus musculus heterogeneous nuclear ribonucleoprotein D (Hnrnpd), transcript variant 1, mRNA                                                                                |
| NM_028320            | 72674          | Mus musculus adiponectin receptor 1 (Adipor1), mRNA                                                                                                                        |
| NM_011749            | 22661          | Mus musculus zinc finger protein 148 (Zfp148), mRNA                                                                                                                        |
| NM_026697            | 68365          | Mus musculus RAB14, member RAS oncogene family (Rab14), mRNA                                                                                                               |
| NM_011327            | 20280          | Mus musculus sterol carrier protein 2, liver (Scp2), mRNA                                                                                                                  |
| NM_175009            | 223527         | Mus musculus enhancer of yellow 2 homolog (Drosophila) (Eny2), mRNA                                                                                                        |
| NM_144812            | 213988         | Mus musculus trinucleotide repeat containing 6b (Tnrc6b), transcript variant 1, mRNA                                                                                       |
| NM_026211            | 67511          | Mus musculus transmembrane emp24 protein transport domain containing 9 (Tmed9), mRNA                                                                                       |
| NM_145711            | 252838         | Mus musculus thymocyte selection-associated high mobility group box (Tox), mRNA                                                                                            |
| NM_008638            | 17768          | Mus musculus methylenetetrahydrofolate dehydrogenase (NAD+ dependent), methenyltetrahydrofolate cyclohydrolase (Mthfd2), nuclear gene encoding mitochondrial protein, mRNA |
